# Supplementary material for: Postural Habits and Joint and Muscle Pain of Iranian School-Aged Students Undergoing Virtual Classes During the COVID-19 Pandemic: A Cross Sectional Study
Source: Research Square preprint supplement (doi:10.21203/rs.3.rs-805805/v1), 2021-09-07
Supplement: Supplementary file 1 [file 91b75928d763d778bf03b276.docx]

**Appendix A**

| **Item No** | **Questions** | **A** | **B** | **C** | **D** |
| --- | --- | --- | --- | --- | --- |
|  | During virtual classes, what kind of body posture do you use? | Sitting  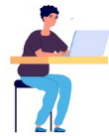 | Lying down  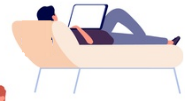 | Standing  **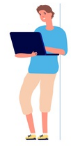** | - |
|  | Please answer this question and select the appropriate image if you are in a sitting position during the virtual session. | Sitting on the ground  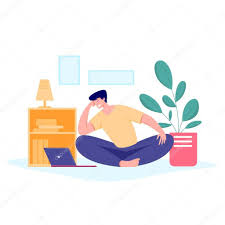 | Sitting at a desk and in a chair  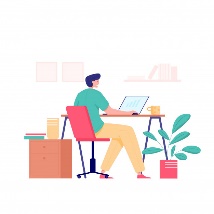 | Sitting on a sofa or couch  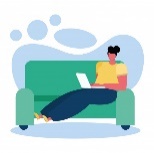 | - |
|  | What is your position in this situation if you are more in a sitting position during the virtual class? | Leaning forward  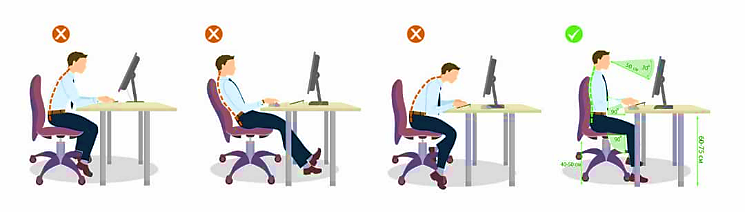 | Leaning Backwards  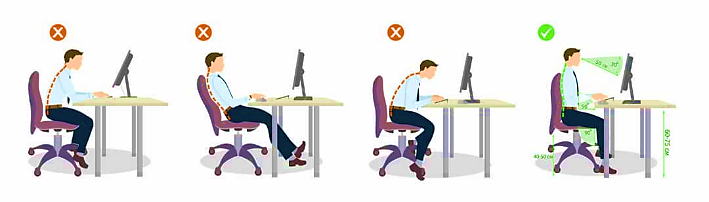 | Curved  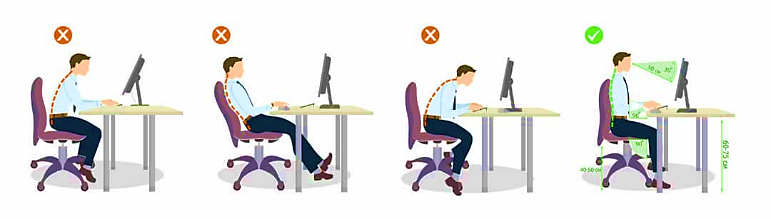 | Correctly  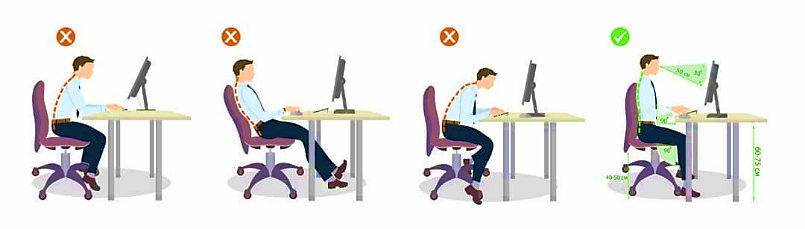 |
|  | Please answer this question and select the appropriate image if you are more in a lying position during the virtual session. | Lying on your back (Supine)  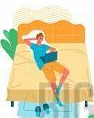 | Lying on stomach (Prone)  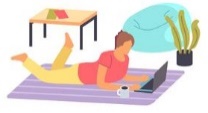 | Side lying  **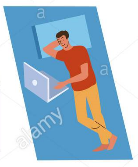** |  |
|  | What is your preferred surface for lying down position? | Lying on the floor  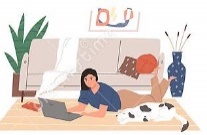 | Lying on a sofa or couch  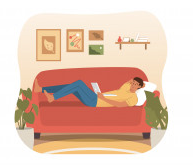 | Lying on the bed  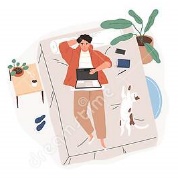 |  |
|  | During the Covid-19 pandemic, did you feel joint or muscle pain while attending virtual classes? | Not at all | Very Little | Relatively High | Very Much |
|  | Which part of your body, based on the images, has the most joint or muscle pain? | Upper back pain  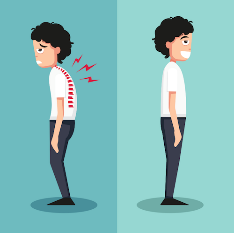 | Shoulder pain  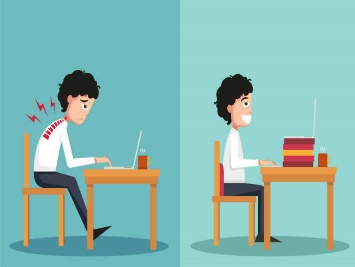 | Neck Pain  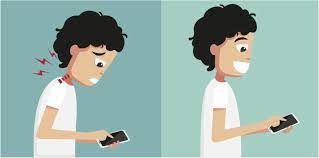 | Low back pain  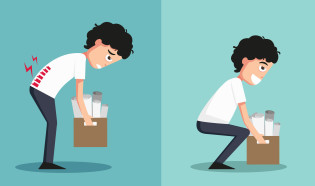 |
